# Supplementary material
Source: Springer Nature journal article supplement (https://www.springermedizin.de/resource/supplementary/12901_2009_54_MOESM3_ESM.pdf/9515450)

Progressive Wavelet Level: Full

Se:6  
Im:18

[A]

Study Date:13/03/2...

Study Time:4:37:1...

MRN:

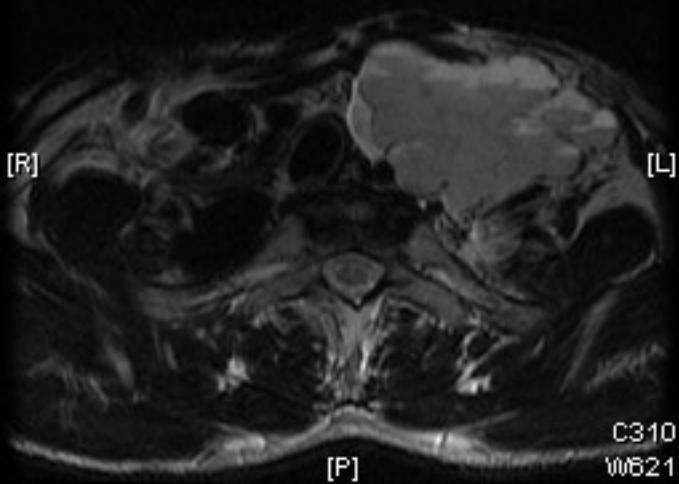

Supplement: MOESM3 [file 9515450]
